# Supplementary material
Source: PubMed Central journal article supplement (PMC3536822)
Supplement: NIHMS427156-supplement-supplement_1.pdf [file NIHMS427156-supplement-supplement_1.pdf]

**e-Table:** Baseline characteristics of those randomized into the lisinopril, candesartan, and HCTZ groups

| Measure                                           | Lisinopril  | Candesartan  | HCTZ         | <i>p-value</i> |
|---------------------------------------------------|-------------|--------------|--------------|----------------|
|                                                   | <i>N</i>    | 18           | 20           |                |
| Age, years                                        | 71 (7)      | 71 (9)       | 71 (7)       | 0.93           |
| Women, %                                          | 61%         | 55%          | 60%          | 0.92           |
| African American, %                               | 28%         | 25%          | 9%           | 0.95           |
| White, %                                          | 61%         | 70%          | 60%          |                |
| High school education or lower, %                 | 17%         | 20%          | 20%          | 0.31           |
| College education or higher, %                    | 83%         | 80%          | 80%          |                |
| Body Mass Index, Kg/m <sup>2</sup>                | 29.76 (6.4) | 28.74 (4.19) | 28.71 (7.66) | 0.84           |
| <b>Baseline cognitive function</b>                |             |              |              |                |
| Mini Mental State Examination                     | 26 (2)      | 26 (3)       | 25 (2)       | 0.2            |
| Executive Clock Draw test                         | 9 (2)       | 9 (2)        | 9 (2)        | 0.97           |
| Trails Making Test-Part A, sec                    | 35 (10)     | 37 (12)      | 44 (21)      | 0.50           |
| Trails Making Test-Part B, sec                    | 86 (44)     | 101 (38)     | 121 (49)     | 0.04           |
| HVLT, immediate recall                            | 23 (6)      | 24 (6)       | 21 (5)       | 0.3            |
| HVLT, recognition                                 | 23 (2)      | 23 (1)       | 22 (2)       | 0.18           |
| Forward Digit Span                                | 6 (1)       | 6 (1)        | 6 (1)        | 0.41           |
| Backward Digit Span                               | 4 (2)       | 3 (1)        | 3 (2)        | 0.04           |
| <b>Baseline BP and HR</b>                         |             |              |              |                |
| Systolic Blood Pressure, mm Hg                    | 154 (18)    | 152 (14)     | 153 (16)     | 0.93           |
| Diastolic Blood pressure, mm Hg                   | 86 (11)     | 81 (7)       | 82 (8)       | 0.2            |
| Heart rate, beats per min                         | 63 (11)     | 64 (8)       | 68 (11)      | 0.27           |
| <b>Baseline Functional and mood measures</b>      |             |              |              |                |
| Gait speed, m/sec                                 | 1.16 (0.21) | 1.09 (0.37)  | 1.04 (0.2)   | 0.49           |
| Instrumental Activities of Daily Living           | 8 (0)       | 8 (0)        | 8 (0)        | 0.59           |
| Physical Activity Scale in the Elderly            | 176 (58)    | 152 (59)     | 162 (59)     | 0.5            |
| Center for Epidemiologic Studies Depression Scale | 8 (7)       | 7 (7)        | 6 (6)        | 0.87           |
| <b>Baseline Biochemical profile</b>               |             |              |              |                |
| Serum Creatinine, mg/dl                           | 0.9 (0.24)  | 0.99 (0.24)  | 0.9 (0.29)   | 0.5            |
| Serum Potassium, meq/dl                           | 4.47 (0.36) | 4.46 (0.31)  | 4.36 (0.46)  | 0.83           |
| <b>Medications</b>                                |             |              |              |                |
| Aspirin use, %                                    | 33%         | 25%          | 27%          | 0.84           |
| Statin use, %                                     | 2%          | 35%          | 27%          | 0.67           |
| <b>Prestudy Antihypertensives</b>                 |             |              |              |                |
| Diuretics, %                                      | 44%         | 30%          | 33%          | 0.63           |
| ACEI, %                                           | 28%         | 25%          | 33%          | 0.86           |

|                              |                 |              |                  |      |
|------------------------------|-----------------|--------------|------------------|------|
| ARB, %                       | 28%             | 0%           | 20%              | 0.03 |
| Calcium channel blockers. %  | 6%              | 15%          | 7%               | 0.61 |
| Beta Blockers, %             | 22%             | 15%          | 40%              | 0.27 |
| <b>Medical HX</b>            |                 |              |                  |      |
| Coronary artery disease, %   | 39%             | 47%          | 40%              | 0.85 |
| Hyperlipidemia               | 39%             | 47%          | 33%              | 0.7  |
| <b>Cerebral hemodynamics</b> |                 |              |                  |      |
| Blood Flow velocity, cm/sec  | 28.09<br>(6.16) | 29.14 (5.75) | 29.85<br>(10.56) | 0.93 |
| Vasoreactivity slope         | 0.56 (0.2)      | 0.51 (0.16)  | 0.57 (0.4)       | 0.72 |
| Vasomotor range              | 0.61 (0.22)     | 0.6 (0.22)   | 0.69 (0.4)       | 0.98 |

---

Numbers are means (standard deviation) or % for categorical variables

P-values from t-test for continuous variables and Chi-square test for categorical variables.

HVLT: Hopkins Verbal Learning test; ACEI: Angiotensin Converting Enzyme Inhibitor; ARB: Angiotensin Receptor Blocker
